# Supplementary material for: Data-driven predictions and novel hypotheses about zoonotic tick vectors from the genus Ixodes
Source: PubMed Central journal article supplement (PMC5815220; doi:10.1186/s12898-018-0163-2), 2018-02-15
Supplement: 12898_2018_163_MOESM1_ESM.pdf [file 12898_2018_163_MOESM1_ESM.pdf]

**Table S1.** The zoonotic vector status for all 244 *Ixodes* species. A vector score of 0 indicates that the species does not vector human diseases while a vector score of 1 signifies that the species has been confirmed to transmit human diseases or is strongly suspected to be a vector based on the GIDEON repository (7) and primary literature.

| <b>Species</b>            | <b>Score</b> |
|---------------------------|--------------|
| <i>I. abrocomae</i>       | 0            |
| <i>I. acuminatus</i>      | 0            |
| <i>I. acutitarsus</i>     | 0            |
| <i>I. affinis</i>         | 1            |
| <i>I. albignaci</i>       | 0            |
| <i>I. alluaudi</i>        | 0            |
| <i>I. amarali</i>         | 0            |
| <i>I. amersoni</i>        | 0            |
| <i>I. anatis</i>          | 0            |
| <i>I. andinus</i>         | 0            |
| <i>I. angustus</i>        | 1            |
| <i>I. antechini</i>       | 0            |
| <i>I. apronophorus</i>    | 0            |
| <i>I. arabukiensis</i>    | 0            |
| <i>I. aragaoi</i>         | 0            |
| <i>I. arboricola</i>      | 1            |
| <i>I. arebiensis</i>      | 0            |
| <i>I. asanumai</i>        | 0            |
| <i>I. aulacodi</i>        | 0            |
| <i>I. auriculaelongae</i> | 0            |
| <i>I. auritulus</i>       | 1            |
| <i>I. australiensis</i>   | 0            |
| <i>I. baergi</i>          | 0            |
| <i>I. bakeri</i>          | 0            |
| <i>I. banksi</i>          | 0            |
| <i>I. bedfordi</i>        | 0            |
| <i>I. bequaerti</i>       | 0            |
| <i>I. berlesei</i>        | 0            |
| <i>I. bivari</i>          | 0            |
| <i>I. boliviensis</i>     | 1            |
| <i>I. brewsterae</i>      | 0            |
| <i>I. browningi</i>       | 0            |
| <i>I. brumpti</i>         | 0            |
| <i>I. brunneus</i>        | 1            |
| <i>I. calcarhebes</i>     | 0            |
| <i>I. caledonicus</i>     | 0            |
| <i>I. canisuga</i>        | 0            |

|                     |   |
|---------------------|---|
| I. capromydis       | 0 |
| I. catherinei       | 0 |
| I. cavipalpus       | 0 |
| I. ceylonensis      | 0 |
| I. chilensis        | 0 |
| I. colasbelcouri    | 0 |
| I. collocaliae      | 0 |
| I. columnae         | 0 |
| I. conepati         | 0 |
| I. confusus         | 0 |
| I. cookei           | 1 |
| I. cooleyi          | 0 |
| I. copei            | 0 |
| I. cordifer         | 0 |
| I. cornuae          | 0 |
| I. cornuatus        | 1 |
| I. cornutus         | 0 |
| I. corwini          | 0 |
| I. crenulatus       | 0 |
| I. cuernavacensis   | 0 |
| I.                  |   |
| cumulatimpunctatus  | 0 |
| I. dampfi           | 0 |
| I. daveyi           | 0 |
| I. dawesi           | 0 |
| I. dendrolagi       | 0 |
| I. dentatus         | 1 |
| I. dicei            | 0 |
| I. diomedae         | 0 |
| I. diversifossus    | 0 |
| I. djaronensis      | 0 |
| I. domerguei        | 0 |
| I. downsi           | 0 |
| I. drakensbergensis | 0 |
| I. eadsi            | 0 |
| I. eastoni          | 0 |
| I. eichhorni        | 0 |
| I. eldaricus        | 0 |
| I. elongatus        | 0 |
| I. eudypitidis      | 1 |
| I. euplecti         | 0 |
| I. evansi           | 0 |
| I. feccialis        | 0 |

|                          |   |
|--------------------------|---|
| <i>I. festai</i>         | 0 |
| <i>I. filippovae</i>     | 0 |
| <i>I. fossulatus</i>     | 0 |
| <i>I. frontalis</i>      | 1 |
| <i>I. fuscipes</i>       | 0 |
| <i>I. fynbosensis</i>    | 0 |
| <i>I. galapagoensis</i>  | 0 |
| <i>I. ghilarovi</i>      | 0 |
| <i>I. gibbosus</i>       | 0 |
| <i>I. granulatus</i>     | 1 |
| <i>I. gregsoni</i>       | 0 |
| <i>I. guatemalensis</i>  | 0 |
| <i>I. hearlei</i>        | 0 |
| <i>I. heinrichi</i>      | 0 |
| <i>I. hexagonus</i>      | 1 |
| <i>I. himalayensis</i>   | 0 |
| <i>I. hirsti</i>         | 0 |
| <i>I. holocyclus</i>     | 1 |
| <i>I. hoogstraali</i>    | 0 |
| <i>I. howelli</i>        | 0 |
| <i>I. hyatti</i>         | 0 |
| <i>I. hydromyidis</i>    | 0 |
| <i>I. jacksoni</i>       | 0 |
| <i>I. jellisoni</i>      | 0 |
| <i>I. jonesae</i>        | 0 |
| <i>I. kaiseri</i>        | 0 |
| <i>I. kashmiricus</i>    | 0 |
| <i>I. kazakstani</i>     | 0 |
| <i>I. kerguelenensis</i> | 0 |
| <i>I. kingi</i>          | 0 |
| <i>I. kohlsi</i>         | 0 |
| <i>I. kopsteini</i>      | 0 |
| <i>I. kuntzi</i>         | 0 |
| <i>I. laguri</i>         | 0 |
| <i>I. lasallei</i>       | 0 |
| <i>I. latus</i>          | 0 |
| <i>I. laysanensis</i>    | 0 |
| <i>I. lemuris</i>        | 0 |
| <i>I. lewisi</i>         | 0 |
| <i>I. lividus</i>        | 1 |
| <i>I. longiscutatus</i>  | 0 |
| <i>I. loricatus</i>      | 1 |
| <i>I. loveridgei</i>     | 0 |

|                          |   |
|--------------------------|---|
| <i>I. luciae</i>         | 0 |
| <i>I. lunatus</i>        | 0 |
| <i>I. luxuriosus</i>     | 0 |
| <i>I. macfarlanei</i>    | 0 |
| <i>I. malayensis</i>     | 0 |
| <i>I. marmotae</i>       | 0 |
| <i>I. marxi</i>          | 1 |
| <i>I. maslovi</i>        | 0 |
| <i>I. matopi</i>         | 0 |
| <i>I. mexicanus</i>      | 0 |
| <i>I. minor</i>          | 1 |
| <i>I. minutae</i>        | 0 |
| <i>I. mitchelli</i>      | 0 |
| <i>I. monospinosus</i>   | 1 |
| <i>I. montoyanus</i>     | 0 |
| <i>I. moreli</i>         | 0 |
| <i>I. moscharius</i>     | 0 |
| <i>I. moschiferi</i>     | 0 |
| <i>I. muniensis</i>      | 0 |
| <i>I. muris</i>          | 0 |
| <i>I. murreleti</i>      | 0 |
| <i>I. myospalacis</i>    | 0 |
| <i>I. myotomys</i>       | 0 |
| <i>I. myrmecobii</i>     | 0 |
| <i>I. nairobiensis</i>   | 0 |
| <i>I. nchisiensis</i>    | 0 |
| <i>I. nectomys</i>       | 0 |
| <i>I. neitzi</i>         | 0 |
| <i>I. nesomys</i>        | 0 |
| <i>I. neuquenensis</i>   | 0 |
| <i>I. nicolasi</i>       | 0 |
| <i>I. nipponensis</i>    | 1 |
| <i>I. nitens</i>         | 0 |
| <i>I. nuttalli</i>       | 0 |
| <i>I. nuttallianus</i>   | 0 |
| <i>I. occultus</i>       | 0 |
| <i>I. ochotonae</i>      | 0 |
| <i>I. okapiae</i>        | 0 |
| <i>I. oldi</i>           | 0 |
| <i>I. ornithorhynchi</i> | 0 |
| <i>I. ovatus</i>         | 1 |
| <i>I. pacificus</i>      | 1 |
| <i>I. paranaensis</i>    | 0 |

|                          |   |
|--------------------------|---|
| <i>I. pararicinus</i>    | 1 |
| <i>I. pavlovskyi</i>     | 1 |
| <i>I. percavatus</i>     | 0 |
| <i>I. peromysci</i>      | 0 |
| <i>I. persulcatus</i>    | 1 |
| <i>I. petauristae</i>    | 1 |
| <i>I. philipi</i>        | 0 |
| <i>I. pilosus</i>        | 0 |
| <i>I. pomerantzevi</i>   | 0 |
| <i>I. pomerantzi</i>     | 0 |
| <i>I. priscicollaris</i> | 0 |
| <i>I. procaviae</i>      | 0 |
| <i>I. prokopjevi</i>     | 0 |
| <i>I. radfordi</i>       | 0 |
| <i>I. rageaui</i>        | 0 |
| <i>I. randrianasoloi</i> | 0 |
| <i>I. rasmus</i>         | 0 |
| <i>I. redikorzevi</i>    | 0 |
| <i>I. rhabdomysae</i>    | 0 |
| <i>I. ricinus</i>        | 1 |
| <i>I. rothschildi</i>    | 0 |
| <i>I. rotundatus</i>     | 0 |
| <i>I. rubicundus</i>     | 0 |
| <i>I. rubidus</i>        | 0 |
| <i>I. rugicollis</i>     | 0 |
| <i>I. rugosus</i>        | 0 |
| <i>I. sachalinensis</i>  | 0 |
| <i>I. scapularis</i>     | 1 |
| <i>I. schillingsi</i>    | 0 |
| <i>I. schulzei</i>       | 0 |
| <i>I. sculptus</i>       | 0 |
| <i>I. semenovi</i>       | 0 |
| <i>I. shahi</i>          | 0 |
| <i>I. siamensis</i>      | 0 |
| <i>I. sigelos</i>        | 0 |
| <i>I. signatus</i>       | 0 |
| <i>I. simplex</i>        | 0 |
| <i>I. sinaloa</i>        | 0 |
| <i>I. sinensis</i>       | 1 |
| <i>I. soricis</i>        | 0 |
| <i>I. spinae</i>         | 0 |
| <i>I. spinicoxalis</i>   | 0 |
| <i>I. spinipalpis</i>    | 1 |

|                          |   |
|--------------------------|---|
| <i>I. steini</i>         | 0 |
| <i>I. stilesi</i>        | 0 |
| <i>I. stromi</i>         | 0 |
| <i>I. subterraneus</i>   | 0 |
| <i>I. succineus</i>      | 0 |
| <i>I. taglei</i>         | 0 |
| <i>I. tamaulipas</i>     | 0 |
| <i>I. tancitarium</i>    | 0 |
| <i>I. tanuki</i>         | 0 |
| <i>I. tapirus</i>        | 0 |
| <i>I. tasmani</i>        | 0 |
| <i>I. tecpanensis</i>    | 0 |
| <i>I. texanus</i>        | 1 |
| <i>I. theilerae</i>      | 0 |
| <i>I. thomasae</i>       | 0 |
| <i>I. tiptoni</i>        | 0 |
| <i>I. tovari</i>         | 0 |
| <i>I. transvaalensis</i> | 0 |
| <i>I. trianguliceps</i>  | 1 |
| <i>I. trichosuri</i>     | 0 |
| <i>I. tropicalis</i>     | 0 |
| <i>I. turdus</i>         | 1 |
| <i>I. ugandanus</i>      | 0 |
| <i>I. unicavatus</i>     | 0 |
| <i>I. uriae</i>          | 1 |
| <i>I. vanidicus</i>      | 0 |
| <i>I. venezuelensis</i>  | 0 |
| <i>I. ventalloi</i>      | 1 |
| <i>I. vespertilionis</i> | 0 |
| <i>I. vestitus</i>       | 0 |
| <i>I. victoriensis</i>   | 0 |
| <i>I. walkerae</i>       | 0 |
| <i>I. werneri</i>        | 0 |
| <i>I. woodi</i>          | 0 |
| <i>I. zaglossi</i>       | 0 |
| <i>I. zairensis</i>      | 0 |

**Table S2.** A complete list of all variables included at the outset of the boosted regression analysis, including definitions and units. Some variables were ultimately excluded from the model on the basis of low coverage or near-zero variation. Included variables can be found in Supplementary Table 3. These data also available in the Figshare repository (DOI: 10.6084/m9.figshare.3437273)

| Predictor                          | Coverage | Definition                                                                                                                                                                                                                                                                                                                                                                                                              | Units |
|------------------------------------|----------|-------------------------------------------------------------------------------------------------------------------------------------------------------------------------------------------------------------------------------------------------------------------------------------------------------------------------------------------------------------------------------------------------------------------------|-------|
| Afrotropical                       | 1        | (1) Afrotropical: Includes sub-Saharan Africa, Madagascar, islands close to the African continent, and a portion of the Arabian Peninsula (Asia) south to a line running east-west from the Strait of Hormuz to the Red Sea.                                                                                                                                                                                            | NA    |
| Australasian                       | 1        | (2) Australasian: Wallaceês Line, which runs between Borneo and Sulawesi and through the Lombok Strait between Bali and Lombok, is considered the north-western limit of this region. All islands east of this line through New Guinea and Australia are included in the Australasian Region, along with New Zealand, the islands between New Guinea and Australia, and the island belt from New Guinea to New Zealand. | NA    |
| Body length                        |          | (3) Body length: Length scapular apices to posterior body                                                                                                                                                                                                                                                                                                                                                               | mm    |
| a. Male adult                      | 0.38     |                                                                                                                                                                                                                                                                                                                                                                                                                         |       |
| b. Unengorged female adult         | 0.28     |                                                                                                                                                                                                                                                                                                                                                                                                                         |       |
| c. Partially engorged female adult | 0.22     |                                                                                                                                                                                                                                                                                                                                                                                                                         |       |
| d. Fully engorged female adult     | 0.29     |                                                                                                                                                                                                                                                                                                                                                                                                                         |       |
| e. Unengorged nymph                | 0.2      |                                                                                                                                                                                                                                                                                                                                                                                                                         |       |

f. Partially engorged nymph 0.09

g. Fully engorged nymph 0.08

h. Unengorged larvae 0.16

i. Partially engorged larvae Data deficient

j. Fully engorged larvae Data deficient

Body width (4) Body width: The body width of tick species across both sexes and across all life stages when un-, partially or fully engorged. mm

a. Male adult 0.33

b. Unengorged female adult 0.23

c. Partially engorged female adult 0.22

d. Fully engorged female adult 0.25

e. Unengorged nymph 0.18



|                              |                |
|------------------------------|----------------|
| f. Partially engorged nymph  | 0.07           |
| g. Fully engorged nymph      | 0.07           |
| h. Unengorged larvae         | 0.26           |
| i. Partially engorged larvae | Data deficient |
| j. Fully engorged larvae     | Data deficient |

Capitulum length (5) Capitulum length: Length from palpa apices to apices of cornua. Capitulum is the movable anterior extension of the body which includes the palps and mouthparts. mm

|                 |      |
|-----------------|------|
| a. Male adult   | 0.3  |
| b. Female adult | 0.39 |
| c. Nymph        | 0.25 |
| d. Larvae       | 0.26 |

Capitulum width (6) Capitulum width: Measured at level of cornua mm

|                 |      |
|-----------------|------|
| a. Male adult   | 0.24 |
| b. Female adult | 0.4  |

|                   |                |                                                                                                                                                                                                               |    |
|-------------------|----------------|---------------------------------------------------------------------------------------------------------------------------------------------------------------------------------------------------------------|----|
| c. Nymph          | 0.23           |                                                                                                                                                                                                               |    |
| d. Larvae         | 0.25           |                                                                                                                                                                                                               |    |
| Circumpolar       | 1              | (7) Circumpolar: The poles on polar islands and continental territories                                                                                                                                       | NA |
| Citation count    | 1              | (8) Citation count: Number of hits when the binomial of tick was searched on Google Scholar.                                                                                                                  | NA |
| Clutch size       | 0.11           | (9) Clutch size: Number of eggs that tick lay.                                                                                                                                                                | NA |
| Dentition tip     |                | (10) Dentition tip: Referring to the arrangement of denticles on the hypostome. Ticks were given numerical value of 1 to 4.                                                                                   | NA |
| a. Male adult     | Data deficient |                                                                                                                                                                                                               |    |
| b. Female adult   | Data deficient |                                                                                                                                                                                                               |    |
| c. Nymph          | 0.3            |                                                                                                                                                                                                               |    |
| d. Larvae         | Data deficient |                                                                                                                                                                                                               |    |
| Family            | 1              | (11) Family: Numerical value of number of families that tick infests.                                                                                                                                         | NA |
| GIDEON            | 1              | (12) GIDEON: Global Infectious Disease and Epidemiology Network. Gave the score of 0 or 1 depending on human infestation description of the binomial of the tick.                                             | NA |
| Human infestation | 1              | (13) Human infestation: A binary indicator describing whether the tick species is known to ectoparasitize humans, according to the Hard Ticks of the World standard reference                                 | NA |
| Hypostomes length |                | (14) Hypostomes length: The median ventral extension of the basis capituli, between the palps, and covered with recurved teeth on its ventral surface; with a pronounced preoral canal on its dorsal surface. | mm |
| a. Male adult     | 0.24           |                                                                                                                                                                                                               |    |
| b. Female adult   | 0.35           |                                                                                                                                                                                                               |    |

|                                  |                                                                                                                                                                                                           |  |      |
|----------------------------------|-----------------------------------------------------------------------------------------------------------------------------------------------------------------------------------------------------------|--|------|
| c. Nymph                         | 0.2                                                                                                                                                                                                       |  |      |
| d. Larvae                        | 0.23                                                                                                                                                                                                      |  |      |
| Hypostomes width                 | (15) Hypostomes width: Numerical value of hypostomes width.                                                                                                                                               |  | mm   |
| a. Male adult                    | Data deficient                                                                                                                                                                                            |  |      |
| b. Female adult                  | Data deficient                                                                                                                                                                                            |  |      |
| c. Nymph                         | Data deficient                                                                                                                                                                                            |  |      |
| d. Larvae                        | 0.14                                                                                                                                                                                                      |  |      |
| Indian ocean                     | 1 (16) Indian ocean                                                                                                                                                                                       |  | NA   |
| Infects multiple families        | 1 (17) Infects multiple families: The tick was assigned 1 if it infects more than one family. The tick was assigned 0 if it infects just one family.                                                      |  | NA   |
| Infects multiple orders          | 1 (18) Infects multiple orders: The tick was assigned 1 if it infects more than one order. The tick was assigned 0 if it infects just one order.                                                          |  | NA   |
| Islands in Central Pacific ocean | (19) Islands in Central Pacific ocean                                                                                                                                                                     |  | NA   |
| Islands in the Atlantic ocean    | (20) Islands in the Atlantic ocean                                                                                                                                                                        |  | NA   |
| Longevity                        | Data deficient (21) Longevity: The duration of the life. However, since the experimental conditions varied for many journal articles, it could not be standardized and it was excluded from the analysis. |  | Days |
| Metatarsus I length              | (22) metatarsus I length: Numerical value of metatarsus I length.                                                                                                                                         |  | mm   |
| a. Male adult                    | Data deficient                                                                                                                                                                                            |  |      |

|                    |                |                                                                                                                                                                                                                                                                                                                                                           |    |
|--------------------|----------------|-----------------------------------------------------------------------------------------------------------------------------------------------------------------------------------------------------------------------------------------------------------------------------------------------------------------------------------------------------------|----|
| b. Female adult    | 0.2            |                                                                                                                                                                                                                                                                                                                                                           |    |
| Nearctic           | 1              | (23) Nearctic: From the Mexican Plateau northward into Canada and Greenland.                                                                                                                                                                                                                                                                              | NA |
| Neotropical        | 1              | (24) Neotropical: From the eastern and western flanks of the Mexican Plateau southward to southern Argentina and Chile; this region also includes the Greater and Lesser Antilles and the Galapagos Islands.                                                                                                                                              | NA |
| Number of families | 0.98           | (25) Number of families: The numerical value of how many other families tick infests. This was extracted from Hard Ticks of the World.                                                                                                                                                                                                                    | NA |
| Number of orders   | 0.98           | (26) Number of orders: The numerical value of how many other orders tick infests. This was extracted from Hard Ticks of the World.                                                                                                                                                                                                                        | NA |
| Order              |                | (27) Order: The host range of tick. Numerical value of orders that tick infests.                                                                                                                                                                                                                                                                          | NA |
| Oriental           | 1              | (28) Oriental: Eastern Pakistan, India, Southeast Asia, southern China and the Ryukyu islands lie within this region, which extends to Wallace's Line in the southwest (see Australasian Region). The region includes Asia south of the Himalayas in the west and south of the Yangtze River in the east. The western boundary is the Indus River Valley. | NA |
| Palaearctic        | 1              | (29) Palaearctic: Europe, Asia north of the Himalayas and west of the Indus River Valley, North Africa through the Sahara, and the northern portion of the Arabian Peninsula (see Afrotropical and Oriental Regions).                                                                                                                                     | NA |
| Palpi length       |                | (30) Palpi length: Length of the second pair of appendages, normally with 4 segments termed articles.                                                                                                                                                                                                                                                     | mm |
| a. Male adult      | 0.22           |                                                                                                                                                                                                                                                                                                                                                           |    |
| b. Female adult    | Data deficient |                                                                                                                                                                                                                                                                                                                                                           |    |
| c. Nymph           | 0.2            |                                                                                                                                                                                                                                                                                                                                                           |    |
| d. Larvae          | 0.23           |                                                                                                                                                                                                                                                                                                                                                           |    |
| Palpi width        |                | (31) Palpi width: Numerical value of Palpi width.                                                                                                                                                                                                                                                                                                         | mm |

a. Male adult Data deficient

b. Female adult 0.21

c. Nymph 0.12

d. Larvae 0.2

Scutum length (32) Scutum length: The length of dorsal sclerotized plate covering the anterior part of the body in ixodid ticks mm

a. Male adult Data deficient

b. Female adult 0.5

c. Nymph 0.27

d. Larvae 0.26

Scutum width (33) Scutum width: Numerical value of scutum width. mm

a. Male adult Data deficient

b. Female adult 0.5

c. Nymph 0.26

d. Larvae 0.25

Spiracular plate diameter (34) Spiracular plate diameter: The diameter of the spiracular plate, which is a modified plate-like structure on the ventral surface of the body which contains the spiracles. In ixodid ticks, the spiracular plate is a prominent structure with numerous ovoid air spaces within the cuticle which are visible externally. mm

|                 |                |    |
|-----------------|----------------|----|
| a. Male adult   | Data deficient | mm |
| b. Female adult | Data deficient |    |
| c. Nymph        | Data deficient |    |
| d. Larvae       | Data deficient |    |

Spiracular plate length (35) Spiracular plate length: The length of the spiracular plate, which is a modified plate-like structure on the ventral surface of the body which contains the spiracles. In ixodid ticks, the spiracular plate is a prominent structure with numerous ovoid air spaces within the cuticle which are visible externally. mm

|                 |                |
|-----------------|----------------|
| a. Male adult   | Data deficient |
| b. Female adult | 0.16           |
| c. Nymph        | 0.12           |
| d. Larvae       | Data deficient |

Spiracular plate width (36) Spiracular plate width: The width of the spiracular plate, which is a modified plate-like structure on the ventral surface of the body which contains the spiracles. In ixodid ticks, the spiracular plate is a prominent structure with numerous ovoid air spaces within the cuticle which are visible externally. mm

|                 |                |
|-----------------|----------------|
| a. Male adult   | Data deficient |
| b. Female adult | 0.14           |
| c. Nymph        | 0.11           |
| d. Larvae       | Data deficient |

|                  |                |                                                                                                                                                                 |    |
|------------------|----------------|-----------------------------------------------------------------------------------------------------------------------------------------------------------------|----|
| Tarsus I length  |                | (37) Tarsus I length: The length of the terminal segment of leg I, which contains Haller's organ on dorsal surface as well as other complex sensory structures. | mm |
| a. Male adult    | 0.23           |                                                                                                                                                                 |    |
| b. Female adult  | 0.34           |                                                                                                                                                                 |    |
| c. Nymph         | 0.17           |                                                                                                                                                                 |    |
| d. Larvae        | 0.18           |                                                                                                                                                                 |    |
| Tarsus I width   | Data deficient | (38) Tarsus I width: The width of the terminal segment of leg I, which contains Haller's organ on dorsal surface as well as other complex sensory structures.   | mm |
| a. Male adult    | Data deficient |                                                                                                                                                                 |    |
| b. Female adult  | Data deficient |                                                                                                                                                                 |    |
| c. Nymph         | Data deficient |                                                                                                                                                                 |    |
| d. Larvae        | Data deficient |                                                                                                                                                                 |    |
| Tarsus IV length |                | (39) Tarsus IV length: The length of the terminal segment of leg IV                                                                                             | mm |
| a. Male adult    | Data deficient |                                                                                                                                                                 |    |
| b. Female adult  | 0.34           |                                                                                                                                                                 |    |
| c. Nymph         | 0.15           |                                                                                                                                                                 |    |
| d. Larvae        | Data deficient |                                                                                                                                                                 |    |
| Tarsus IV width  | Data deficient | (40) Tarsus IV width: The width of the terminal segment of leg IV                                                                                               | mm |

a. Male  
adult            Data deficient

b. Female  
adult            Data deficient

c. Nymph            Data deficient

d. Larvae            Data deficient

Zooregion  
diversity            (41) Zooregion diversity: If the tick inhabited more than one of zoogeographical region, it was  
1    given the score of 1. If the tick inhabits only in one region, it was assigned 0.            NA



**Table S3.** The parameters, performance, and results of two generalized boosted regression models: the first model (Vector status) describes the traits predicting zoonotic vector status (the response variable) of tick species from the genus *Ixodes*. The second model was constructed to investigate how well traits of *Ixodes* ticks predict the study effort dedicated to each tick species (CitCount, the response variable; CitCount = the number of citations returned from a search on the Latin binomial for each of 244 *Ixodes* tick species in Web of Science). These results show high accuracy (0.916) for the model predicting vector status. In contrast, study effort is poorly predicted by tick traits (low pseudo-R<sup>2</sup> on test data), suggesting that any sampling bias that exists for *Ixodes* tick species (Supplementary Figure 1) does not extend to tick traits.

| <b>Response</b>            | <b>Vector status</b> | <b>CitCount</b>    |
|----------------------------|----------------------|--------------------|
| <b>Error distribution</b>  | bernoulli            | poisson            |
| <b>Train/test fraction</b> | 70/30                | 70/30              |
| <b>Shrinkage</b>           | 0.00025              | 0.00015            |
| <b>Interaction depth</b>   | 3                    | 3                  |
| <b>Best.iter</b>           | 9645/30,000          | 29745/50,000       |
| <b>Performance (train)</b> | 0.988 (AUC)          | 0.613 (pseudo-R2)  |
| <b>Performance (test)</b>  | 0.916 (AUC)          | -0.058 (pseudo-R2) |

  

| <b>Predictive Traits</b>    | <b>Rel. Imp.</b> | <b>Predictive Traits</b>            | <b>Rel. Imp.</b> |
|-----------------------------|------------------|-------------------------------------|------------------|
| Capitulum length larvae     | 10.563           | Clutch.size                         | 65.790           |
| Number of families infected | 10.445           | Body width unfed nymph              | 7.323            |
| Number of orders infected   | 10.184           | Body width unengorged adult female  | 5.574            |
| Multiple orders infected    | 9.178            | Capitulum length larvae             | 5.507            |
| Zooregion Diversity         | 8.911            | Body length fully engorged nymph    | 4.894            |
| Clutch.size                 | 3.895            | Body length unengorged adult female | 4.127            |
| Body length adult male      | 3.148            | Body length unfed nymph             | 2.630            |

|                                     |       |                                   |       |
|-------------------------------------|-------|-----------------------------------|-------|
| Body length fully engorged female   | 3.131 | Palpi width larvae                | 1.584 |
| Capitulum length adult female       | 2.702 | Body length fully engorged female | 1.263 |
| Scutum length adult female          | 2.685 | Body width unfed larvae           | 0.546 |
| Body length unengorged adult female | 2.542 | Bod width fully engorged female   | 0.313 |
| Palpi length larvae                 | 2.256 | Capitulum width larvae            | 0.156 |
| Body width adult male               | 2.130 | Tarsus I length larvae            | 0.074 |
| Tarsus I length larvae              | 2.090 | Number of orders infected         | 0.033 |
| Palaearctic                         | 2.043 | Number of families infected       | 0.031 |
| Body length unfed nymph             | 1.713 | Body length unfed larvae          | 0.023 |
| Tarsus IV length female             | 1.576 | Multiple orders infected          | 0.022 |
| Scutum width adult female           | 1.568 | Scutum width larvae               | 0.020 |
| Oriental                            | 1.527 | Multiple families infected        | 0.018 |
| Afrotropical                        | 1.524 | Palpi length larvae               | 0.009 |
| Capitulum length nymph              | 1.351 | Zooregion Diversity               | 0.007 |
| Palpi width larvae                  | 1.278 | Body width adult male             | 0.005 |
| Body length unfed larvae            | 1.157 | Hypostome length larvae           | 0.005 |
| Capitulum width larvae              | 1.073 | Scutum length adult female        | 0.004 |
| Nearctic                            | 1.038 | Hypostome length nymph            | 0.003 |
| Multiple families infected          | 0.940 | Capitulum length nymph            | 0.003 |
| Bod width fully engorged female     | 0.935 | Scutum length nymph               | 0.003 |
| Scutum length larvae                | 0.803 | Scutum length larvae              | 0.003 |

|                                       |       |                                      |       |
|---------------------------------------|-------|--------------------------------------|-------|
| Palpi length nymph                    | 0.772 | Capitulum width nymph                | 0.003 |
| Tarsus I length adult male            | 0.638 | Palpi length nymph                   | 0.003 |
| Capitulum length adult male           | 0.528 | Palaearctic                          | 0.003 |
| Hypostome length larvae               | 0.504 | Body width fully engorged nymph      | 0.002 |
| Tarsus I length female                | 0.498 | Capitulum length adult female        | 0.002 |
| Scutum width larvae                   | 0.489 | Oriental                             | 0.002 |
| Body width unfed larvae               | 0.488 | Scutum width adult female            | 0.002 |
| Body length fully engorged nymph      | 0.448 | Capitulum width adult female         | 0.002 |
| Capitulum width adult male            | 0.326 | Body length adult male               | 0.002 |
| Neotropical                           | 0.326 | Hypostome length adult female        | 0.001 |
| Body length partially engorged nymph  | 0.319 | Hypostome length adult male          | 0.001 |
| Spiracular plate width nymph          | 0.317 | Scutum width nymph                   | 0.001 |
| Spiracular plate length nymph         | 0.307 | denition tip nymph                   | 0.001 |
| Spiracular plate length female        | 0.227 | Tarsus I length adult male           | 0.001 |
| Scutum width nymph                    | 0.138 | Palpi length adult male              | 0.001 |
| Body width unfed nymph                | 0.130 | Tarsus IV length female              | 0.001 |
| Body length partially engorged female | 0.123 | Body length partially engorged nymph | 0.001 |
| Body width unengorged adult female    | 0.106 | Tarsus I length nymph                | 0.001 |
| Tarsus I length nymph                 | 0.102 | Capitulum width adult male           | 0.001 |
| Body width partially engorged female  | 0.094 | Nearctic                             | 0.001 |
| denition tip nymph                    | 0.082 | Tarsus I length female               | 0.000 |

|                                     |       |                                       |       |
|-------------------------------------|-------|---------------------------------------|-------|
| Capitulum width adult male          | 0.076 | Capitulum length adult male           | 0.000 |
| Palpi length adult male             | 0.076 | Afrotropical                          | 0.000 |
| Hypostome length adult female       | 0.071 | Spiracular plate length nymph         | 0.000 |
| Capitulum width nymph               | 0.070 | Tarsus IV length nymph                | 0.000 |
| Hypostome length adult male         | 0.068 | Spiracular plate width nymph          | 0.000 |
| Spiracular plate length nymph       | 0.057 | Australasian                          | 0.000 |
| Tarsus IV length nymph              | 0.055 | Hypostome width larvae                | 0.000 |
| Australasian                        | 0.040 | Body width partially engorged nymph   | 0.000 |
| Spiracular plate length female      | 0.029 | Neotropical                           | 0.000 |
| Body width partially engorged nymph | 0.021 | Spiracular plate length female        | 0.000 |
| Hypostome width larvae              | 0.020 | Spiracular plate width female         | 0.000 |
| Hypostome length nymph              | 0.019 | Palpi width nymph                     | 0.000 |
| Body width partially engorged nymph | 0.018 | Body width partially engorged female  | 0.000 |
| Palpi width female                  | 0.013 | Metatarsus I length adult female      | 0.000 |
| Palpi width nymph                   | 0.012 | Body length partially engorged female | 0.000 |
| Metatarsus I length adult female    | 0.004 | Palpi width female                    | 0.000 |
| Denition base nymph                 | 0.000 | Denition base nymph                   | 0.000 |

**Table S4.** Full citations for references cited in Table 1 reporting human infestation by predicted zoonotic tick vectors.

| Rank | Species                  | Documentation of Human Infestation                                                                                                                                                                                                                                                                                                                    |
|------|--------------------------|-------------------------------------------------------------------------------------------------------------------------------------------------------------------------------------------------------------------------------------------------------------------------------------------------------------------------------------------------------|
| 1    | <i>I. rubicundus</i>     | Horak, I. G., Fourie, L. J., Heyne, H., Walker, J. B. & Needham, G. R. Ixodid Ticks Feeding on Humans in South Africa: with Notes on Preferred Hosts, Geographic Distribution, Seasonal Occurrence and Transmission of Pathogens. <i>Exp. Appl. Acarol.</i> <b>27</b> , 113–136 (2002).                                                               |
| 2    | <i>I. canisuga</i>       | None                                                                                                                                                                                                                                                                                                                                                  |
| 3    | <i>I. acuminatus</i>     | Hillyard, P. Ticks of north-west Europe—keys and notes for identification of species. Synopses of the British fauna no. 52. <i>Field Studies Council, Shrewsbury, United Kingdom</i> (1996).                                                                                                                                                          |
| 4    | <i>I. vespertilionis</i> | Piksa, K., Nowak-Chmura, M. & Siuda, K. First case of human infestation by the tick <i>Ixodes vespertilionis</i> (Acari: Ixodidae). <i>Int. J. Acarology</i> <b>39</b> , 1–2 (2013).                                                                                                                                                                  |
| 5    | <i>I. sculptus</i>       | Salkeld, D. J., Eisen, R. J., Antolin, M. F., Stapp, P. & Eisen, L. Host usage and seasonal activity patterns of <i>Ixodes kingi</i> and <i>I. sculptus</i> (Acari: Ixodidae) nymphs in a Colorado prairie landscape, with a summary of published North American host records for all life stages. <i>J. Vector Ecol.</i> <b>31</b> , 168–180 (2006). |
| 6    | <i>I. apronophorus</i>   | Fedorov, V. G. [Ixodoidea ticks on men in Western Siberia]. <i>Med. Parazitol.</i> <b>37</b> , 615–616 (1968).                                                                                                                                                                                                                                        |
| 7    | <i>I. woodi</i>          | Merten, H. A. & Durden, L. A. A state-by-state survey of ticks recorded from humans in the United States. <i>J. Vector Ecol.</i> <b>25</b> , 102–113 (2000).                                                                                                                                                                                          |

|    |                       |                                                                                                                                                                                                                                                                                                                                                       |
|----|-----------------------|-------------------------------------------------------------------------------------------------------------------------------------------------------------------------------------------------------------------------------------------------------------------------------------------------------------------------------------------------------|
| 8  | <i>I. kingi</i>       | Salkeld, D. J., Eisen, R. J., Antolin, M. F., Stapp, P. & Eisen, L. Host usage and seasonal activity patterns of <i>Ixodes kingi</i> and <i>I. sculptus</i> (Acari: Ixodidae) nymphs in a Colorado prairie landscape, with a summary of published North American host records for all life stages. <i>J. Vector Ecol.</i> <b>31</b> , 168–180 (2006). |
| 9  | <i>I. kazakstani</i>  | Filippova, N. A. <i>Ixodid ticks (Ixodinae). Fauna USSR New Ser. 4 (4)</i> . (Nauka, Moscow, Leningrad, 1977).                                                                                                                                                                                                                                        |
| 10 | <i>I. redikorzevi</i> | Emchuk, E. M. <i>CERTAIN BIOLOGICAL PECULIARITIES OF IXODES REDIKORZEVI OLEN</i> . (1968).<br><br>Bursali, A., Keskin, A. & Tekin, S. A review of the ticks (Acari: Ixodida) of Turkey: species diversity, hosts and geographical distribution. <i>Exp. Appl. Acarol.</i> <b>57</b> , 91–104 (2012).                                                  |
| 11 | <i>I. trichosuri</i>  | None                                                                                                                                                                                                                                                                                                                                                  |
| 12 | <i>I. eldaricus</i>   | None                                                                                                                                                                                                                                                                                                                                                  |
| 13 | <i>I. laguri</i>      | Bursali, A., Keskin, A. & Tekin, S. A review of the ticks (Acari: Ixodida) of Turkey: species diversity, hosts and geographical distribution. <i>Exp. Appl. Acarol.</i> <b>57</b> , 91–104 (2012).                                                                                                                                                    |
| 14 | <i>I. aragaoi</i>     | None                                                                                                                                                                                                                                                                                                                                                  |
